# Supplementary material for: Anthropometric measures and serum estrogen metabolism in postmenopausal women: the Women’s Health Initiative Observational Study
Source: Springer Nature journal article supplement (doi:10.1186/s13058-017-0810-0), 2017-03-11
Supplement: MOESM1 [file 12135470]

**Table S1. Geometric means (pmol/L) and 95% confidence intervals (CI) of serum estrogens/estrogen metabolites by current BMI (<25, 25-29.9, 30-34.9, 35-39.9, ≥40 kg/m<sup>2</sup>) in postmenopausal women not using menopausal hormone therapy: the Women's Health Initiative Observational Study**

| Current BMI (kg/m <sup>2</sup> )       | Model 1 <sup>a</sup>     |         |         |         |      |                      | Model 1 + unconjugated estradiol <sup>b</sup> |         |         |         |      |                      |
|----------------------------------------|--------------------------|---------|---------|---------|------|----------------------|-----------------------------------------------|---------|---------|---------|------|----------------------|
|                                        | Geometric means (95% CI) |         |         |         |      | p-trend <sup>c</sup> | Geometric means (95% CI)                      |         |         |         |      | p-trend <sup>c</sup> |
|                                        | <25                      | 25-29.9 | 30-34.9 | 35-39.9 | ≥40  |                      | <25                                           | 25-29.9 | 30-34.9 | 35-39.9 | ≥40  |                      |
| Median (kg/m <sup>2</sup> )            | 22.7                     | 27.3    | 31.8    | 37.0    | 44.0 |                      | 22.7                                          | 27.3    | 31.8    | 37.0    | 44.0 |                      |
| N                                      | 345                      | 294     | 168     | 85      | 61   |                      | 345                                           | 294     | 168     | 85      | 61   |                      |
| Weighted N <sup>d</sup>                | 13571                    | 9351    | 5205    | 1756    | 931  |                      | 13571                                         | 9351    | 5205    | 1756    | 931  |                      |
| <b>Estrone</b>                         | 236                      | 335     | 386     | 518     | 593  | <0.001**             | 314                                           | 344     | 328     | 327     | 312  | 0.91                 |
| Conjugated                             | 177                      | 264     | 309     | 423     | 479  | <0.001**             | 237                                           | 271     | 261     | 263     | 246  | 0.59                 |
| Unconjugated                           | 50.8                     | 62.1    | 69.6    | 84.0    | 100  | <0.001**             | 64.5                                          | 63.4    | 60.8    | 57.2    | 58.5 | 0.13                 |
| <b>Estradiol</b>                       | 45.1                     | 58.5    | 63.8    | 87.5    | 126  | <0.001**             | 60.4                                          | 60.1    | 54.1    | 54.7    | 65   | 0.33                 |
| Conjugated                             | 30.5                     | 39.8    | 39.7    | 53.9    | 78.5 | <0.001**             | 38.1                                          | 40.6    | 34.9    | 37.5    | 47.2 | 0.99                 |
| Unconjugated                           | 9.97                     | 14.8    | 19.6    | 30.8    | 40.8 | <0.001**             | NA                                            | NA      | NA      | NA      | NA   | NA                   |
| <b>2-Hydroxyestrone</b>                | 55.5                     | 71.6    | 81.7    | 81.2    | 92.8 | <0.001**             | 66.7                                          | 72.8    | 73.6    | 60.3    | 61.1 | 0.83                 |
| <b>2-Hydroxyestradiol</b>              | 14.2                     | 17.7    | 20      | 20.2    | 23.3 | <0.001**             | 16.9                                          | 18      | 18.1    | 15.2    | 15.7 | 0.69                 |
| <b>2-Methoxyestrone</b>                | 37.7                     | 43.6    | 46.2    | 49.4    | 53.4 | 0.001**              | 44.9                                          | 44.3    | 41.8    | 37.2    | 35.9 | 0.05                 |
| Conjugated                             | 27.3                     | 32.1    | 33.5    | 34.8    | 40.6 | 0.002**              | 31.9                                          | 32.5    | 30.7    | 27.1    | 28.7 | 0.25                 |
| Unconjugated                           | 9.64                     | 10.5    | 10.9    | 13.9    | 12.6 | 0.02*                | 12.1                                          | 10.7    | 9.53    | 9.61    | 7.48 | <0.001**             |
| <b>2-Methoxyestradiol</b>              | 11.3                     | 13.5    | 15.4    | 19.1    | 18.4 | <0.001**             | 13.8                                          | 13.7    | 13.8    | 13.9    | 11.8 | 0.50                 |
| Conjugated                             | 8.98                     | 10.7    | 12.8    | 15.2    | 14.2 | <0.001**             | 10.8                                          | 10.9    | 11.5    | 11.2    | 9.3  | 0.83                 |
| Unconjugated                           | 1.87                     | 2.19    | 2.03    | 3.05    | 3.53 | <0.001**             | 2.35                                          | 2.24    | 1.79    | 2.12    | 2.12 | 0.002*               |
| <b>2-Hydroxyestrone-3-methyl ether</b> | 6.74                     | 7.94    | 8.59    | 9.18    | 8.66 | 0.004**              | 7.74                                          | 8.04    | 7.94    | 7.33    | 6.32 | 0.24                 |
| <b>4-Hydroxyestrone</b>                | 6.75                     | 8.68    | 10.1    | 9.88    | 11.2 | <0.001**             | 8.05                                          | 8.82    | 9.13    | 7.43    | 7.51 | 0.96                 |
| <b>4-Methoxyestrone</b>                | 3.93                     | 4.36    | 4.86    | 5.00    | 4.60 | 0.02*                | 4.52                                          | 4.42    | 4.49    | 3.99    | 3.36 | 0.19                 |
| <b>4-Methoxyestradiol</b>              | 1.65                     | 1.86    | 2.10    | 2.50    | 2.47 | <0.001**             | 1.96                                          | 1.89    | 1.90    | 1.89    | 1.66 | 0.30                 |
| <b>16α-Hydroxyestrone</b>              | 27.4                     | 35.8    | 40.9    | 41.4    | 46   | <0.001**             | 33.1                                          | 36.4    | 36.8    | 30.6    | 30.1 | 0.92                 |
| <b>Estriol</b>                         | 113                      | 155     | 171     | 192     | 198  | <0.001**             | 138                                           | 158     | 153     | 139     | 126  | 0.94                 |
| Conjugated estriol                     | 86.7                     | 124     | 137     | 153     | 156  | <0.001**             | 106                                           | 126     | 123     | 111     | 99.6 | 0.60                 |
| Unconjugated                           | 23                       | 27.3    | 31      | 36.8    | 38.9 | <0.001**             | 28.0                                          | 27.8    | 27.7    | 26.8    | 24.9 | 0.29                 |
| <b>16-Ketoestradiol</b>                | 29                       | 38.2    | 43.3    | 44.4    | 50.4 | <0.001**             | 34.9                                          | 38.8    | 39      | 32.8    | 33   | 0.95                 |
| <b>16-Epiestriol</b>                   | 12.8                     | 16.4    | 18.7    | 20.0    | 21.4 | <0.001**             | 15.2                                          | 16.6    | 17.0    | 15.2    | 14.6 | 0.78                 |
| <b>17-Epiestriol</b>                   | 10.7                     | 13.5    | 16.1    | 16.5    | 18.4 | <0.001**             | 12.7                                          | 13.7    | 14.6    | 12.5    | 12.5 | 0.72                 |

<sup>a</sup> Model 1: Adjusted for age at blood draw (<55, 55-59, 60-64, 66-69, 70-74, 75-79 years), blood draw year (1993-1996, 1997-1998), race (white, non-white), smoking status (never, former, current), time since menopause (<10, 10-19, ≥20 years, missing), physical activity (0, 0.1-9.9, ≥10 MET-hr/wk).

<sup>b</sup> Model 1 + unconjugated estradiol (log-transformed, continuous).

<sup>c</sup> p-trend was estimated using the Wald test for continuous BMI (kg/m<sup>2</sup>).

<sup>d</sup> Weighted N reflects weighted counts and refer to the study cohort.

\* indicates False Discovery Rate (FDR) q-value<0.05 and ≥0.01. \*\* indicates FDR q-value<0.01.

Abbreviations: BMI=body mass index, CI=confidence interval, NA=not applicable.
