# Supplementary material for: Anthropometric measures and serum estrogen metabolism in postmenopausal women: the Women’s Health Initiative Observational Study
Source: Springer Nature journal article supplement (doi:10.1186/s13058-017-0810-0), 2017-03-11
Supplement: MOESM4 [file 12135470]

**Table S2. Geometric means (pmol/L) and 95% confidence intervals (CI) of serum estrogens/estrogen metabolites by waist to hip ratio in postmenopausal women currently using menopausal hormone therapy: the Women's Health Initiative Observational Study**

|                                        | Model 1 <sup>a</sup>     |                   |                   |                      |                 |                     | Model 1 + Current BMI <sup>b</sup> |                   |                   |                      |                 |                     |
|----------------------------------------|--------------------------|-------------------|-------------------|----------------------|-----------------|---------------------|------------------------------------|-------------------|-------------------|----------------------|-----------------|---------------------|
|                                        | Geometric means (95% CI) |                   |                   | p-trend <sup>c</sup> | %Δ <sup>d</sup> | p-diff <sup>e</sup> | Geometric means (95% CI)           |                   |                   | p-trend <sup>c</sup> | %Δ <sup>d</sup> | p-diff <sup>e</sup> |
|                                        | <0.76                    | 0.76-0.82         | ≥0.83             |                      |                 |                     | <0.76                              | 0.76-0.82         | ≥0.83             |                      |                 |                     |
| <b>Median</b>                          | 0.73                     | 0.79              | 0.88              |                      |                 |                     | 0.73                               | 0.79              | 0.88              |                      |                 |                     |
| <b>N</b>                               | 341                      | 321               | 215               |                      |                 |                     | 341                                | 321               | 215               |                      |                 |                     |
| <b>Weighted N<sup>f</sup></b>          | 9444                     | 8370              | 7338              |                      |                 |                     | 9444                               | 8370              | 7338              |                      |                 |                     |
| <b>Estrone</b>                         | 3038 (2213, 2759)        | 3407 (2588, 3165) | 2761 (2061, 3699) | 0.32                 | -9.1            | 0.50                | 3001 (2175, 4141)                  | 3386 (2567, 4467) | 2792 (2081, 3746) | 0.44                 | -7.0            | 0.63                |
| Conjugated                             |                          |                   |                   |                      |                 |                     |                                    |                   |                   |                      |                 |                     |
| Unconjugated                           | 224 (178, 283)           | 225 (183, 276)    | 194 (154, 245)    | 0.18                 | -13.4           | 0.20                | 219 (173, 277)                     | 223 (181, 274)    | 198 (157, 250)    | 0.36                 | -9.6            | 0.38                |
| <b>Estradiol</b>                       | 433 (321, 584)           | 459 (346, 610)    | 386 (293, 507)    | 0.30                 | -10.9           | 0.38                | 418 (308, 566)                     | 451 (339, 600)    | 398 (303, 524)    | 0.62                 | -4.8            | 0.73                |
| Conjugated                             | 357 (256, 499)           | 395 (289, 540)    | 308 (229, 416)    | 0.19                 | -13.7           | 0.32                | 342 (244, 481)                     | 387 (283, 530)    | 319 (237, 430)    | 0.43                 | -6.7            | 0.66                |
| Unconjugated                           | 40.8 (31.2, 53.4)        | 43.7 (34.9, 54.6) | 47.3 (37.1, 60.2) | 0.11                 | 15.9            | 0.21                | 42.2 (32.1, 55.4)                  | 44.3 (35.3, 55.7) | 46.0 (36.2, 58.4) | 0.24                 | 9.0             | 0.47                |
| <b>2-Hydroxyestrone</b>                | 435 (345, 548)           | 480 (392, 587)    | 389 (310, 490)    | 0.30                 | -10.6           | 0.32                | 426 (337, 538)                     | 475 (388, 582)    | 396 (314, 501)    | 0.59                 | -7.0            | 0.55                |
| <b>2-Hydroxyestradiol</b>              | 102 (82.6, 127)          | 111 (91.8, 134)   | 92.4 (74.5, 115)  | 0.27                 | -9.4            | 0.33                | 100 (80.6, 124)                    | 110 (90.4, 133)   | 94.3 (75.6, 118)  | 0.58                 | -5.7            | 0.60                |
| <b>2-Methoxyestrone</b>                | 272 (222, 332)           | 271 (225, 326)    | 219 (183, 262)    | <b>0.03</b>          | -19.5           | <b>0.04</b>         | 257 (211, 314)                     | 264 (219, 318)    | 229 (191, 276)    | 0.25                 | -10.9           | 0.30                |
| Conjugated                             | 162 (129, 204)           | 166 (133, 208)    | 144 (118, 177)    | 0.20                 | -11.1           | 0.27                | 153 (121, 194)                     | 162 (130, 203)    | 151 (123, 185)    | 0.79                 | -1.3            | 0.90                |
| Unconjugated                           | 83.8 (64.0, 110)         | 78.5 (60.9, 101)  | 54.0 (40.7, 71.7) | <b>0.003</b>         | -35.6           | <b>0.003</b>        | 77.1 (59.1, 101)                   | 75.6 (58.6, 97.6) | 57.8 (43.3, 77.2) | 0.06                 | -25.0           | 0.06                |
| <b>2-Methoxyestradiol</b>              | 91.3 (70.1, 119)         | 83.5 (64.6, 108)  | 76.8 (61.0, 96.7) | 0.05                 | -15.9           | 0.09                | 86.9 (66.9, 113)                   | 81.5 (63.1, 105)  | 80.3 (63.5, 102)  | 0.30                 | -7.6            | 0.49                |
| Conjugated                             | 76.5 (57.2, 102)         | 73.0 (55.1, 96.7) | 64.7 (50.3, 83.3) | 0.06                 | -15.4           | 0.15                | 70.6 (53.1, 94.0)                  | 70.5 (53.4, 93.1) | 69.0 (53.3, 89.3) | 0.51                 | -2.3            | 0.85                |
| Unconjugated                           | 9.37 (7.71, 11.4)        | 8.59 (7.20, 10.2) | 8.17 (6.79, 9.83) | 0.29                 | -12.8           | 0.19                | 9.13 (7.50, 11.1)                  | 8.49 (7.08, 10.2) | 8.34 (6.92, 10.1) | 0.57                 | -8.7            | 0.40                |
| <b>2-Hydroxyestrone-3-methyl ether</b> | 44.1 (35.9, 54.1)        | 42.8 (35.0, 52.3) | 35.4 (29.1, 43.0) | <b>0.03</b>          | -19.7           | <b>0.03</b>         | 42.7 (34.7, 52.5)                  | 42.1 (34.4, 51.6) | 36.5 (29.9, 44.4) | 0.13                 | -14.5           | 0.13                |
| <b>4-Hydroxyestrone</b>                | 58.3 (46.0, 73.8)        | 64.3 (52.5, 78.8) | 51.9 (41.1, 65.5) | 0.31                 | -11.0           | 0.30                | 57.4 (45.2, 72.9)                  | 63.8 (51.9, 78.4) | 52.6 (41.5, 66.8) | 0.56                 | -8.4            | 0.48                |
| <b>4-Methoxyestrone</b>                | 28.6 (23.2, 35.1)        | 28.3 (23.5, 34.0) | 22.8 (19.1, 27.3) | <b>0.04</b>          | -20.3           | <b>0.03</b>         | 27.5 (22.2, 33.9)                  | 27.7 (23.0, 33.5) | 23.6 (19.7, 28.4) | 0.24                 | -14.2           | 0.17                |
| <b>4-Methoxyestradiol</b>              | 12.1 (9.06, 16.2)        | 10.9 (8.29, 14.3) | 10.8 (8.34, 14.0) | 0.19                 | -10.7           | 0.31                | 11.5 (8.59, 15.5)                  | 10.6 (8.09, 13.9) | 11.3 (8.70, 14.7) | 0.62                 | -1.7            | 0.89                |
| <b>16α-Hydroxyestrone</b>              | 228 (179, 291)           | 257 (209, 316)    | 208 (164, 264)    | 0.42                 | -8.8            | 0.42                | 224 (175, 287)                     | 255 (206, 314)    | 211 (165, 270)    | 0.72                 | -5.8            | 0.63                |
| <b>Estriol</b>                         | 1093 (832, 1438)         | 1172 (928, 1479)  | 985 (761, 1274)   | 0.47                 | -9.9            | 0.39                | 1077 (814, 1423)                   | 1163 (920, 1470)  | 999 (769, 1298)   | 0.74                 | -7.2            | 0.57                |
| Conjugated                             | 937 (703, 1248)          | 1031 (806, 1319)  | 846 (646, 1107)   | 0.49                 | -9.7            | 0.43                | 917 (683, 1230)                    | 1021 (798, 1308)  | 861 (655, 1130)   | 0.78                 | -6.1            | 0.65                |
| Unconjugated                           | 127 (101, 160)           | 128 (104, 156)    | 114 (90.6, 144)   | 0.53                 | -10.2           | 0.31                | 123 (96.8, 155)                    | 126 (103, 154)    | 117 (92.9, 148)   | 0.94                 | -4.9            | 0.70                |
| <b>16-Ketoestradiol</b>                | 265 (205, 341)           | 290 (235, 359)    | 245 (193, 312)    | 0.54                 | -7.5            | 0.53                | 259 (200, 336)                     | 288 (232, 356)    | 250 (195, 320)    | 0.85                 | -3.5            | 0.78                |
| <b>16-Epiestriol</b>                   | 80.8 (64.3, 102)         | 89.4 (73.6, 109)  | 73.2 (59.0, 90.9) | 0.44                 | -9.4            | 0.38                | 79.0 (62.6, 99.8)                  | 88.4 (72.6, 108)  | 74.7 (59.7, 93.5) | 0.80                 | -5.4            | 0.65                |
| <b>17-Epiestriol</b>                   | 54.9 (43.3, 69.6)        | 56.0 (45.3, 69.2) | 51.3 (41.1, 64.0) | 0.55                 | -6.6            | 0.55                | 53.6 (41.8, 68.6)                  | 55.4 (44.6, 68.8) | 52.4 (41.5, 66.1) | 0.90                 | -2.2            | 0.87                |

<sup>a</sup> Model 1: Adjusted for age at blood draw (<55, 55-59, 60-64, 65-69, 70-74, 75-79 years), blood draw year (1993-1996, 1997-1998), race (white, non-white), smoking status (never, former, current), time since menopause (<10, 10-19, ≥20 years, missing), moderate- to vigorous-intensity physical activity (0, 0.1-9.9, ≥10 MET-hr/wk).

<sup>b</sup> Model 1 + current BMI (kg/m<sup>2</sup>, continuous).

<sup>c</sup> p-trend was estimated using the Wald test for continuous waist-to-hip ratio.

<sup>d</sup> %Δ indicates the percent change in estrogens/estrogen metabolite levels comparing women with waist-to-hip ratio ≥0.83 vs. <0.76 and was estimated by taking the ratio of the geometric mean difference in estrogens/estrogen metabolite levels between women with waist-to-hip ratio ≥0.83 vs. <0.76 to the geometric mean of women with waist-to-hip ratio <0.76, multiplied by 100.

<sup>e</sup> p-diff was estimated using the Wald test and indicates a p-value for comparing estrogens/estrogen metabolite levels of women with waist-to-hip ratio ≥0.83 vs. <0.76.

<sup>f</sup> Weighted N reflects weighted counts and refer to the study cohort.

Note: All False Discovery Rate q-values>0.05.

Abbreviations: CI=confidence interval.
