# Supplementary material for: Anthropometric measures and serum estrogen metabolism in postmenopausal women: the Women’s Health Initiative Observational Study
Source: Springer Nature journal article supplement (doi:10.1186/s13058-017-0810-0), 2017-03-11
Supplement: MOESM5 [file 12135470]

**Table S3. Geometric means (pmol/L) and 95% confidence intervals (CI) of serum estrogens/estrogen metabolites by BMI at age 18 in postmenopausal women: the Women's Health Initiative Observational Study**

|                                        | Never and former menopausal hormone therapy users |                           |                       |                      |                 |                     | Current menopausal hormone therapy users |                           |                       |                      |                 |                     |
|----------------------------------------|---------------------------------------------------|---------------------------|-----------------------|----------------------|-----------------|---------------------|------------------------------------------|---------------------------|-----------------------|----------------------|-----------------|---------------------|
|                                        | Geometric means (95% CI) <sup>a</sup>             |                           |                       | p-trend <sup>b</sup> | %Δ <sup>c</sup> | p-diff <sup>d</sup> | Geometric means (95% CI) <sup>a</sup>    |                           |                       | p-trend <sup>b</sup> | %Δ <sup>c</sup> | p-diff <sup>d</sup> |
|                                        | <20 kg/m <sup>2</sup>                             | 20-21.9 kg/m <sup>2</sup> | ≥22 kg/m <sup>2</sup> |                      |                 |                     | <20 kg/m <sup>2</sup>                    | 20-21.9 kg/m <sup>2</sup> | ≥22 kg/m <sup>2</sup> |                      |                 |                     |
| Median (kg/m <sup>2</sup> )            | 18.7                                              | 20.9                      | 23.9                  |                      |                 |                     | 18.8                                     | 20.8                      | 23.4                  |                      |                 |                     |
| N                                      | 412                                               | 300                       | 221                   |                      |                 |                     | 371                                      | 334                       | 154                   |                      |                 |                     |
| Weighted N <sup>e</sup>                | 14325                                             | 9690                      | 6133                  |                      |                 |                     | 10882                                    | 9510                      | 4269                  |                      |                 |                     |
| <b>Estrone</b>                         | 269 (223, 324)                                    | 300 (246, 364)            | 322 (260, 399)        | 0.27                 | 19.7            | 0.09                | 2927 (2208, 3880)                        | 3057 (2350, 3978)         | 3384 (2388, 4794)     | 0.42                 | 15.6            | 0.36                |
| Conjugated                             | 206 (167, 254)                                    | 235 (189, 291)            | 248 (195, 314)        | 0.29                 | 20.4            | 0.11                | 2649 (1981, 3542)                        | 2844 (2171, 3726)         | 3097 (2151, 4460)     | 0.43                 | 16.9            | 0.35                |
| Unconjugated                           | 55.7 (48.6, 63.9)                                 | 55.3 (47.8, 64.0)         | 65.1 (54.6, 77.6)     | 0.23                 | 16.9            | 0.08                | 205 (167, 252)                           | 211 (172, 259)            | 231 (176, 302)        | 0.54                 | 12.7            | 0.32                |
| <b>Estradiol</b>                       | 49.8 (40.4, 61.5)                                 | 50.7 (40.8, 63.1)         | 64.1 (49.3, 83.4)     | <b>0.04</b>          | 28.7            | <b>0.03</b>         | 391 (296, 515)                           | 444 (336, 588)            | 441 (311, 625)        | 0.50                 | 12.8            | 0.42                |
| Conjugated                             | 32.6 (26.1, 40.8)                                 | 33.2 (26.7, 41.3)         | 42.3 (32.4, 55.1)     | <b>0.04</b>          | 29.8            | <b>0.03</b>         | 322 (237, 436)                           | 370 (273, 501)            | 377 (257, 555)        | 0.47                 | 17.1            | 0.34                |
| Unconjugated                           | 12.7 (10.0, 16.2)                                 | 13.3 (10.3, 17.2)         | 16.2 (12.0, 21.7)     | 0.08                 | 27.6            | 0.08                | 40.1 (32.0, 50.3)                        | 46.9 (37.0, 59.5)         | 43.6 (32.9, 57.9)     | 0.55                 | 8.7             | 0.50                |
| <b>2-Hydroxyestrone</b>                | 59.5 (50.3, 70.5)                                 | 67.5 (57.5, 79.2)         | 66.9 (56.2, 79.6)     | 0.32                 | 12.4            | 0.16                | 434 (352, 534)                           | 412 (335, 507)            | 449 (346, 583)        | 0.54                 | 3.5             | 0.77                |
| <b>2-Hydroxyestradiol</b>              | 15.2 (12.9, 17.9)                                 | 16.9 (14.3, 19.9)         | 16.4 (13.9, 19.4)     | 0.55                 | 7.9             | 0.32                | 99.8 (82.2, 121)                         | 98.9 (81.8, 120)          | 105 (82.0, 134)       | 0.39                 | 5.2             | 0.65                |
| <b>2-Methoxyestrone</b>                | 39.9 (34.9, 45.6)                                 | 39.2 (34.3, 44.8)         | 42.5 (36.4, 49.8)     | 0.42                 | 6.5             | 0.43                | 251 (214, 296)                           | 251 (211, 297)            | 253 (198, 324)        | 0.90                 | 0.8             | 0.95                |
| Conjugated                             | 28.9 (24.9, 33.4)                                 | 28.6 (24.7, 33.1)         | 31.0 (26.1, 36.8)     | 0.34                 | 7.3             | 0.43                | 158 (130, 192)                           | 159 (129, 197)            | 152 (115, 201)        | 0.89                 | -3.8            | 0.75                |
| Unconjugated                           | 10.1 (8.76, 11.7)                                 | 9.83 (8.47, 11.4)         | 10.5 (8.89, 12.5)     | 0.90                 | 4.0             | 0.69                | 68.6 (53.4, 88.1)                        | 70.0 (54.2, 90.5)         | 72.2 (51.0, 102)      | 0.95                 | 5.2             | 0.75                |
| <b>2-Methoxyestradiol</b>              | 12.0 (10.0, 14.4)                                 | 13.1 (10.8, 15.9)         | 13.0 (10.6, 15.8)     | 0.39                 | 8.3             | 0.42                | 83.4 (66.2, 105)                         | 83.7 (65.6, 107)          | 87.1 (66.5, 114)      | 0.16                 | 4.4             | 0.69                |
| Conjugated                             | 9.55 (7.82, 11.7)                                 | 10.4 (8.44, 12.9)         | 10.2 (8.25, 12.7)     | 0.47                 | 6.8             | 0.49                | 71.2 (55.3, 91.8)                        | 72.2 (55.3, 94.2)         | 73.0 (54.4, 97.9)     | 0.25                 | 2.5             | 0.84                |
| Unconjugated                           | 1.95 (1.66, 2.28)                                 | 2.11 (1.76, 2.54)         | 2.19 (1.81, 2.65)     | 0.32                 | 12.3            | 0.21                | 8.40 (7.16, 9.85)                        | 8.91 (7.47, 10.6)         | 8.61 (6.77, 11.0)     | 0.55                 | 2.5             | 0.83                |
| <b>2-Hydroxyestrone-3-methyl ether</b> | 7.05 (6.11, 8.13)                                 | 7.50 (6.55, 8.59)         | 7.72 (6.56, 9.09)     | 0.51                 | 9.5             | 0.26                | 40.2 (33.6, 48.1)                        | 38.3 (31.5, 46.5)         | 38.5 (30.3, 49.0)     | 0.67                 | -4.2            | 0.69                |
| <b>4-Hydroxyestrone</b>                | 7.31 (6.16, 8.68)                                 | 8.30 (7.03, 9.80)         | 8.24 (6.89, 9.84)     | 0.36                 | 12.7            | 0.17                | 57.8 (46.7, 71.4)                        | 54.7 (44.5, 67.3)         | 60.7 (46.5, 79.1)     | 0.46                 | 5.0             | 0.69                |
| <b>4-Methoxyestrone</b>                | 4.11 (3.56, 4.73)                                 | 4.18 (3.64, 4.79)         | 4.34 (3.70, 5.10)     | 0.56                 | 5.6             | 0.50                | 25.8 (21.7, 30.7)                        | 25.8 (21.7, 30.6)         | 27.1 (21.7, 34.0)     | 0.62                 | 5.0             | 0.65                |
| <b>4-Methoxyestradiol</b>              | 1.76 (1.48, 2.11)                                 | 1.83 (1.54, 2.18)         | 1.78 (1.47, 2.17)     | 0.75                 | 1.1             | 0.92                | 11.4 (8.84, 14.8)                        | 11.1 (8.56, 14.5)         | 11.2 (8.29, 15.1)     | 0.41                 | -1.8            | 0.87                |
| <b>16α-Hydroxyestrone</b>              | 29.7 (24.8, 35.5)                                 | 33.9 (28.7, 40.1)         | 32.9 (27.4, 39.6)     | 0.44                 | 10.8            | 0.23                | 229 (183, 285)                           | 220 (178, 273)            | 245 (187, 321)        | 0.43                 | 7.0             | 0.56                |
| <b>Estriol</b>                         | 125 (105, 149)                                    | 142 (120, 168)            | 140 (116, 170)        | 0.32                 | 12.0            | 0.22                | 1062 (835, 1352)                         | 1063 (843, 1340)          | 1128 (841, 1513)      | 0.48                 | 6.2             | 0.66                |
| Conjugated                             | 96.7 (79.8, 117)                                  | 113 (94.1, 136)           | 109 (88.2, 134)       | 0.27                 | 12.7            | 0.24                | 918 (713, 1181)                          | 923 (724, 1177)           | 978 (715, 1337)       | 0.58                 | 6.5             | 0.66                |
| Unconjugated                           | 25.1 (21.6, 29.3)                                 | 26.7 (23.0, 31.0)         | 28.3 (23.7, 33.7)     | 0.48                 | 12.7            | 0.19                | 118 (96.9, 145)                          | 123 (100, 152)            | 122 (94.3, 157)       | 0.86                 | 3.4             | 0.81                |
| <b>16-Ketoestradiol</b>                | 31.6 (26.4, 37.9)                                 | 36.1 (30.5, 42.8)         | 35.0 (28.9, 42.4)     | 0.51                 | 10.8            | 0.27                | 263 (211, 328)                           | 256 (206, 318)            | 291 (221, 384)        | 0.37                 | 10.6            | 0.43                |
| <b>16-Epiestriol</b>                   | 14.0 (12.0, 16.5)                                 | 15.4 (13.2, 18.1)         | 14.9 (12.6, 17.6)     | 0.41                 | 6.4             | 0.45                | 78.6 (64.6, 95.7)                        | 80.9 (66.1, 98.9)         | 80.0 (62.3, 103)      | 0.67                 | 1.8             | 0.88                |
| <b>17-Epiestriol</b>                   | 11.6 (9.97, 13.5)                                 | 13.1 (11.1, 15.4)         | 12.6 (10.7, 14.8)     | 0.46                 | 8.6             | 0.32                | 52.7 (42.9, 64.9)                        | 52.8 (42.7, 65.2)         | 59.0 (46.1, 75.6)     | 0.18                 | 12.0            | 0.32                |

<sup>a</sup> Adjusted for age at blood draw (<55, 55-59, 60-64, 65-69, 70-74, 75-79 years), blood draw year (1993-1996, 1997-1998), race (white, non-white), smoking status (never, former, current), time since menopause (<10, 10-19, ≥20 years, missing).

<sup>b</sup> p-trend was estimated using the Wald test for continuous BMI at age 18 (kg/m<sup>2</sup>).

<sup>c</sup> %Δ indicates the percent change in estrogens/estrogen metabolite levels comparing women with BMI at age 18 years ≥22 vs. <20 kg/m<sup>2</sup> and was estimated by taking the ratio of the geometric mean difference in estrogens/estrogen metabolite levels between women with BMI at age 18 years ≥22 vs. <20 kg/m<sup>2</sup> to the geometric mean of women with BMI at age 18 years <20 kg/m<sup>2</sup>, multiplied by 100.

<sup>d</sup> p-diff was estimated using the Wald test and indicates a p-value for comparing estrogens/estrogen metabolite levels of women with BMI at age 18 years ≥22 vs. <20 kg/m<sup>2</sup>.

<sup>e</sup> Weighted N reflects weighted counts and refer to the study cohort.

Note: All False Discovery Rate q-values>0.05.

Abbreviations: BMI=body mass index, CI=confidence interval.
