# Supplementary material for: Anthropometric measures and serum estrogen metabolism in postmenopausal women: the Women’s Health Initiative Observational Study
Source: Springer Nature journal article supplement (doi:10.1186/s13058-017-0810-0), 2017-03-11
Supplement: MOESM6 [file 12135470]

**Table S4. Geometric means (pmol/L) and 95% confidence intervals (CI) of serum estrogens/estrogen metabolites by current BMI in postmenopausal women not using menopausal hormone therapy among controls only: the Women's Health Initiative Observational Study**

| Median (kg/m <sup>2</sup> )            | Model 1 <sup>a</sup>     |                           |                       |                      |                 |                     | Model 1 + unconjugated estradiol <sup>b</sup> |                           |                       |                      |                 |                     |
|----------------------------------------|--------------------------|---------------------------|-----------------------|----------------------|-----------------|---------------------|-----------------------------------------------|---------------------------|-----------------------|----------------------|-----------------|---------------------|
|                                        | Geometric means (95% CI) |                           |                       | p-trend <sup>c</sup> | %Δ <sup>d</sup> | p-diff <sup>e</sup> | Geometric means (95% CI) <sup>e</sup>         |                           |                       | p-trend <sup>c</sup> | %Δ <sup>d</sup> | p-diff <sup>e</sup> |
|                                        | <25 kg/m <sup>2</sup>    | 25-29.9 kg/m <sup>2</sup> | ≥30 kg/m <sup>2</sup> |                      |                 |                     | <25 kg/m <sup>2</sup>                         | 25-29.9 kg/m <sup>2</sup> | ≥30 kg/m <sup>2</sup> |                      |                 |                     |
| N                                      | 193                      | 143                       | 113                   |                      |                 |                     | 193                                           | 143                       | 113                   |                      |                 |                     |
| Weighted N <sup>f</sup>                | 13419                    | 9200                      | 7692                  |                      |                 |                     | 13419                                         | 9200                      | 7692                  |                      |                 |                     |
| <b>Estrone</b>                         | 238 (201, 282)           | 335 (282, 398)            | 429 (353, 521)        | <0.001**             | 80.3            | <0.001**            | 277 (236, 325)                                | 304 (262, 354)            | 289 (246, 338)        | 0.90                 | 4.3             | 0.65                |
| Conjugated                             | 178 (147, 216)           | 264 (218, 319)            | 345 (279, 428)        | <0.001**             | 93.8            | <0.001**            | 208 (174, 250)                                | 238 (201, 283)            | 229 (191, 275)        | 0.58                 | 10.1            | 0.36                |
| Unconjugated                           | 51.1 (44.7, 58.5)        | 62.1 (55.0, 70.3)         | 75.2 (64.5, 87.8)     | <0.001**             | 47.2            | <0.001**            | 58.1 (51.9, 65.0)                             | 57.3 (52.6, 62.4)         | 54.0 (48.9, 59.6)     | 0.14                 | -7.1            | 0.26                |
| <b>Estradiol</b>                       | 45.7 (37.5, 55.8)        | 58.8 (48.5, 71.4)         | 73.5 (59.4, 90.9)     | <0.001**             | 60.8            | <0.001**            | 53.5 (46.2, 61.9)                             | 53.2 (46.3, 61.2)         | 48.7 (42.8, 55.5)     | 0.37                 | -9.0            | 0.21                |
| Conjugated                             | 30.8 (25.0, 38.1)        | 40.0 (32.3, 49.6)         | 45.6 (36.1, 57.7)     | <0.001**             | 48.1            | <0.001**            | 34.8 (28.6, 42.5)                             | 37.0 (30.8, 44.5)         | 33.2 (27.6, 39.9)     | 0.95                 | -4.6            | 0.63                |
| Unconjugated                           | 10.1 (8.11, 12.7)        | 14.8 (12.3, 17.9)         | 23.4 (18.7, 29.3)     | <0.001**             | 131.            | <0.001**            | NA                                            | NA                        | NA                    | NA                   | NA              | NA                  |
| <b>2-Hydroxyestrone</b>                | 55.4 (47.5, 64.6)        | 71.4 (61.2, 83.2)         | 82.7 (70.1, 97.6)     | <0.001**             | 49.3            | <0.001**            | 61.0 (52.5, 71.0)                             | 67.1 (58.3, 77.2)         | 64.2 (54.8, 75.2)     | 0.87                 | 5.2             | 0.57                |
| <b>2-Hydroxyestradiol</b>              | 14.2 (12.2, 16.5)        | 17.7 (15.1, 20.7)         | 20.3 (17.2, 24.1)     | <0.001**             | 43.0            | <0.001**            | 15.5 (13.4, 18.0)                             | 16.7 (14.4, 19.3)         | 16.0 (13.6, 18.8)     | 0.72                 | 3.2             | 0.73                |
| <b>2-Methoxyestrone</b>                | 37.7 (33.0, 42.9)        | 43.4 (38.2, 49.4)         | 47.5 (41.3, 54.6)     | 0.001**              | 26.0            | 0.002**             | 41.3 (36.7, 46.5)                             | 40.9 (36.7, 45.6)         | 37.3 (33.0, 42.1)     | 0.05                 | -9.7            | 0.16                |
| Conjugated                             | 27.4 (23.7, 31.6)        | 32.0 (27.7, 37.0)         | 34.4 (29.4, 40.2)     | 0.003**              | 25.5            | 0.006**             | 29.7 (26.1, 33.8)                             | 30.4 (26.8, 34.4)         | 27.8 (24.1, 32.0)     | 0.26                 | -6.4            | 0.43                |
| Unconjugated                           | 9.66 (8.37, 11.1)        | 10.4 (9.07, 12.0)         | 11.6 (9.99, 13.5)     | 0.01*                | 20.1            | 0.03*               | 10.9 (9.53, 12.5)                             | 9.66 (8.46, 11.0)         | 8.44 (7.34, 9.70)     | <0.001**             | -22.6           | 0.001*              |
| <b>2-Methoxyestradiol</b>              | 11.4 (9.58, 13.5)        | 13.4 (11.5, 15.7)         | 16.4 (13.6, 19.8)     | <0.001**             | 43.9            | <0.001**            | 12.6 (10.9, 14.7)                             | 12.6 (11.0, 14.4)         | 12.5 (10.5, 14.9)     | 0.53                 | -0.8            | 0.92                |
| Conjugated                             | 8.99 (7.43, 10.9)        | 10.7 (8.82, 12.9)         | 13.4 (10.9, 16.5)     | <0.001**             | 49.1            | <0.001**            | 9.93 (8.32, 11.9)                             | 10.0 (8.42, 11.9)         | 10.3 (8.47, 12.6)     | 0.87                 | 3.7             | 0.69                |
| Unconjugated                           | 1.90 (1.63, 2.21)        | 2.20 (1.91, 2.54)         | 2.35 (2.01, 2.73)     | <0.001**             | 23.7            | 0.006**             | 2.15 (1.92, 2.40)                             | 2.03 (1.80, 2.30)         | 1.70 (1.53, 1.90)     | 0.001*               | -20.9           | <0.001**            |
| <b>2-Hydroxyestrone-3-methyl ether</b> | 6.72 (5.89, 7.67)        | 7.91 (6.86, 9.12)         | 8.70 (7.51, 10.1)     | 0.006**              | 29.5            | 0.001**             | 7.23 (6.31, 8.29)                             | 7.55 (6.60, 8.65)         | 7.19 (6.16, 8.40)     | 0.28                 | -0.6            | 0.95                |
| <b>4-Hydroxyestrone</b>                | 6.74 (5.77, 7.87)        | 8.65 (7.43, 10.1)         | 10.2 (8.52, 12.1)     | <0.001**             | 51.3            | <0.001**            | 7.39 (6.34, 8.61)                             | 8.16 (7.08, 9.40)         | 7.98 (6.71, 9.48)     | 0.92                 | 8.0             | 0.42                |
| <b>4-Methoxyestrone</b>                | 3.91 (3.42, 4.47)        | 4.34 (3.86, 4.89)         | 4.85 (4.14, 5.67)     | 0.02*                | 24.0            | 0.01*               | 4.21 (3.67, 4.82)                             | 4.15 (3.71, 4.64)         | 4.01 (3.42, 4.70)     | 0.22                 | -4.8            | 0.61                |
| <b>4-Methoxyestradiol</b>              | 1.65 (1.40, 1.95)        | 1.86 (1.61, 2.15)         | 2.21 (1.84, 2.66)     | <0.001**             | 33.9            | 0.001**             | 1.81 (1.55, 2.12)                             | 1.75 (1.53, 2.00)         | 1.73 (1.45, 2.08)     | 0.31                 | -4.4            | 0.65                |
| <b>16α-Hydroxyestrone</b>              | 27.4 (23.2, 32.3)        | 35.7 (30.4, 41.9)         | 41.5 (34.8, 49.6)     | <0.001**             | 51.5            | <0.001**            | 30.2 (25.7, 35.5)                             | 33.5 (28.9, 38.8)         | 32.1 (27.0, 38.1)     | 0.96                 | 6.3             | 0.52                |
| <b>Estriol</b>                         | 113 (96.7, 133)          | 155 (133, 180)            | 178 (150, 211)        | <0.001**             | 57.5            | <0.001**            | 126 (108, 146)                                | 145 (126, 165)            | 135 (115, 160)        | 0.90                 | 7.1             | 0.44                |
| Conjugated estriol                     | 86.6 (72.8, 103)         | 124 (105, 146)            | 142 (118, 172)        | <0.001**             | 64.0            | <0.001**            | 96.2 (81.3, 114)                              | 116 (99.1, 135)           | 108 (90.0, 130)       | 0.57                 | 12.3            | 0.27                |
| Unconjugated                           | 23.1 (20.0, 26.6)        | 27.3 (23.9, 31.3)         | 33.0 (28.2, 38.6)     | <0.001**             | 42.9            | <0.001**            | 25.7 (22.6, 29.1)                             | 25.6 (22.7, 28.8)         | 25.1 (21.7, 29.0)     | 0.33                 | -2.3            | 0.78                |
| <b>16-Ketoestradiol</b>                | 29.0 (24.5, 34.2)        | 38.1 (32.3, 44.9)         | 44.3 (36.9, 53.0)     | <0.001**             | 52.8            | <0.001**            | 32.0 (27.2, 37.6)                             | 35.7 (30.7, 41.6)         | 34.2 (28.7, 40.7)     | 0.99                 | 6.9             | 0.48                |
| <b>16-Epiestriol</b>                   | 12.8 (11.1, 14.9)        | 16.3 (13.9, 19.2)         | 19.2 (16.4, 22.6)     | <0.001**             | 50.0            | <0.001**            | 14.0 (12.1, 16.2)                             | 15.4 (13.3, 17.9)         | 15.3 (13.1, 17.8)     | 0.74                 | 9.3             | 0.28                |
| <b>17-Epiestriol</b>                   | 10.7 (9.32, 12.3)        | 13.4 (11.6, 15.6)         | 16.4 (14.0, 19.3)     | <0.001**             | 53.3            | <0.001**            | 11.7 (10.3, 13.4)                             | 12.7 (11.1, 14.5)         | 13.0 (11.1, 15.2)     | 0.69                 | 11.1            | 0.19                |

<sup>a</sup> Model 1: Adjusted for age at blood draw (<55, 55-59, 60-64, 66-69, 70-74, 75-79 years), blood draw year (1993-1996, 1997-1998), race (white, non-white), smoking status (never, former, current), time since menopause (<10, 10-19, ≥20 years, missing), physical activity (0, 0.1-9.9, ≥10 MET-hr/wk).

<sup>b</sup> Model 1 + unconjugated estradiol (log-transformed, continuous).

<sup>c</sup> p-trend was estimated using the Wald test for continuous BMI (kg/m<sup>2</sup>).

<sup>d</sup> %Δ indicates the percent change in estrogens/estrogen metabolite levels comparing women with current BMI ≥30 vs. <25 kg/m<sup>2</sup> and was estimated by taking the ratio of the geometric mean difference in estrogens/estrogen metabolite levels between women with current BMI ≥30 vs. <25 kg/m<sup>2</sup> to the geometric mean of women with current BMI <25 kg/m<sup>2</sup>, multiplied by 100.

<sup>e</sup> p-diff was estimated using the Wald test and indicates a p-value for comparing estrogens/estrogen metabolite levels of women with current BMI ≥30 vs. <25 kg/m<sup>2</sup>.

<sup>f</sup> Weighted N reflects weighted counts and refer to the study cohort.

\* indicates False Discovery Rate (FDR) q-value<0.05 and ≥0.01. \*\* indicates FDR q-value<0.01.

Abbreviations: BMI=body mass index, CI=confidence interval, NA=not applicable.
